# Supplementary material for: CD8+ T cells in beige adipogenesis and energy homeostasis
Source: JCI journal article supplement (doi:10.1172/jci.insight.95456), 2018-03-07
Supplement: sd1 [file 1]

## Supplemental Materials for

### CD8<sup>+</sup> T cells in beige adipogenesis and energy homeostasis

Maria Moysidou<sup>1,2,†</sup>, Sevasti Karaliota<sup>1,\*</sup>, Elisavet Kodela<sup>1,2</sup>, Maria Salagianni<sup>1</sup>, Yassemi Koutmani<sup>1</sup>, Antonia Katsouda<sup>1</sup>, Konstantia Kodella<sup>1</sup>, Panagiotis Tsakanikas<sup>1</sup>, Styliani Ourailidou<sup>1</sup>, Evangelos Andreakos<sup>1</sup>, Nikolaos Kostomitsopoulos<sup>1</sup>, Dimitris Skokos<sup>3</sup>, Antonios Chatzigeorgiou<sup>4</sup>, Kyoung-Jin Chung<sup>4</sup>, Stefan Bornstein<sup>4</sup>, Mark W. Sleeman<sup>5</sup>, Triantafyllos Chavakis<sup>4</sup>, Katia P. Karalis<sup>1,4,6\*</sup>

\*Correspondence: Katia Karalis ([katia.karalis@childrens.harvard.edu](mailto:katia.karalis@childrens.harvard.edu)) OR

Sevasti Karaliota ([skaral@bioacademy.gr](mailto:skaral@bioacademy.gr)).

## SUPPLEMENTAL FIGURES

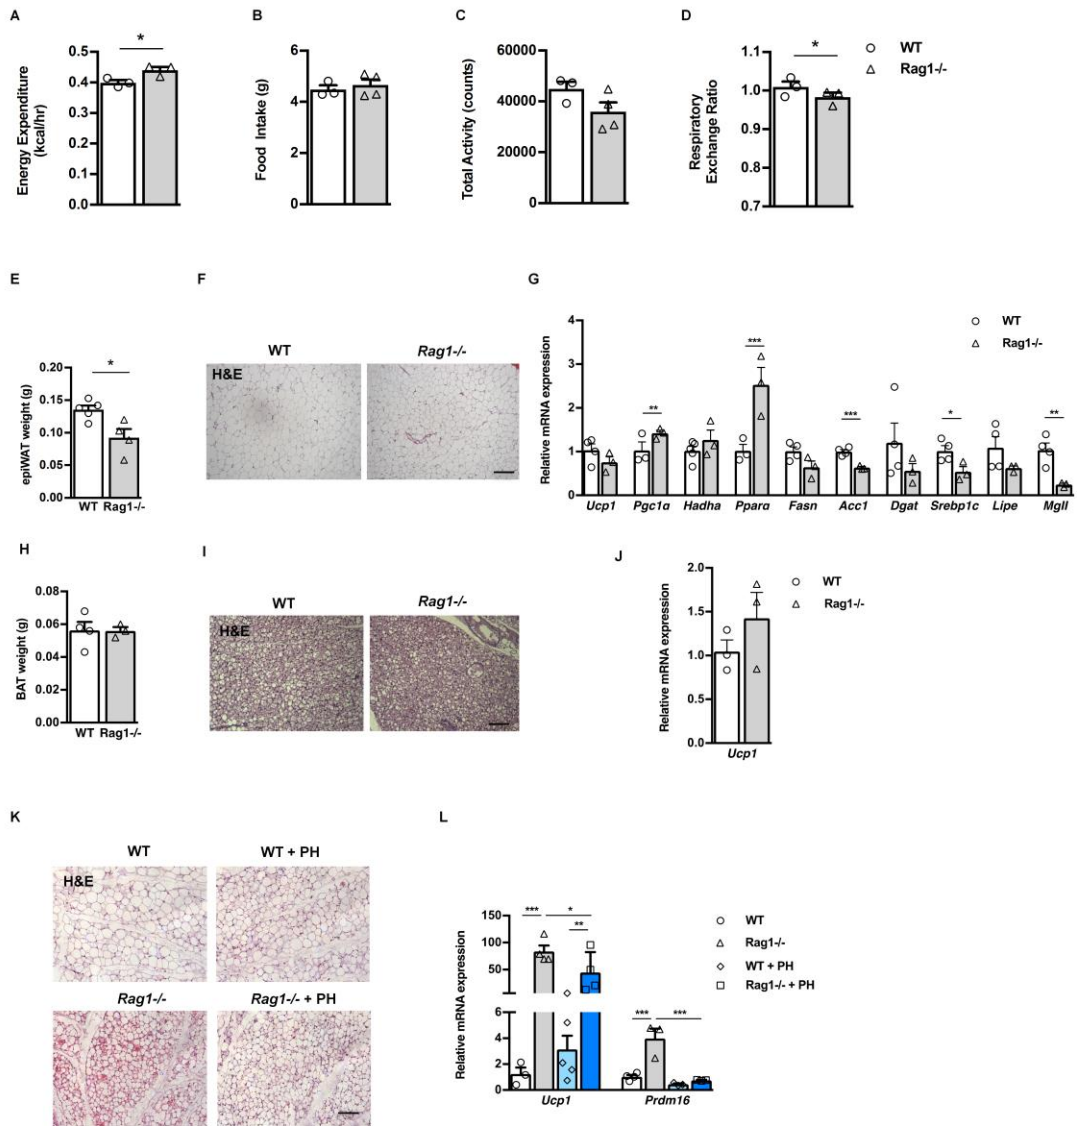

**Supplemental Figure 1. Lymphocyte deficiency promotes more efficient lipid utilization in epiWAT.**

(A-D) Assessment of metabolic behavior using indirect calorimetry, including energy expenditure adjusted to body weight (A) food intake (B), total activity (C) and respiratory exchange ratio (RER) (D). n = 4 per group. Data shown are derived from one experiment

(E) Characterization of the absolute epiWAT weight of age and weight-matched WT and *Rag1*<sup>-/-</sup> mice. n=5 (F) Representative images of H&E staining. Scale bar: 100µm. (G) Gene

expression analysis of *Ucp1* and lipid metabolism related genes in the above groups. Data are presented as mean expression normalized to actin ± S.E.M. n = 4 per group. P values, \**p* < 0.05, \*\**p* < 0.01, \*\*\**p* < 0.001, Student's t-test. (H) Characterization of the BAT weight in

age and weight-matched WT and *Rag1*<sup>-/-</sup> mice. n=5 (I) Representative images of H&E staining in the above groups. Scale bar:100 µm. (J) Gene expression analysis for *Ucp1* in the

above groups. n = 4 per group. Data are mean expression normalized to actin ± S.E.M. Data shown was derived from one out of two independent experiments. (K) Representative images

of H&E staining in the scWAT of WT, *Rag1*<sup>-/-</sup> and WT and *Rag1*<sup>-/-</sup> mice administered PH (8mg/kg) pre-diluted in PBS, via the drinking water. Control groups have received PBS

containing drinking water for 5 days. Scale bar: 100µm. (L) Gene expression analysis of thermogenic markers in the above groups. Data shown are derived from one experiment.

Data are presented as mean expression normalized to actin ± S.E.M. n = 4 per group. \*\**p* < 0.01, \*\*\**p* < 0.001, 2-way Anova with Bonferroni's post test.

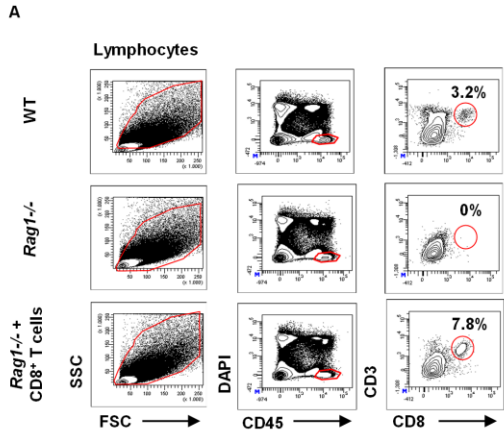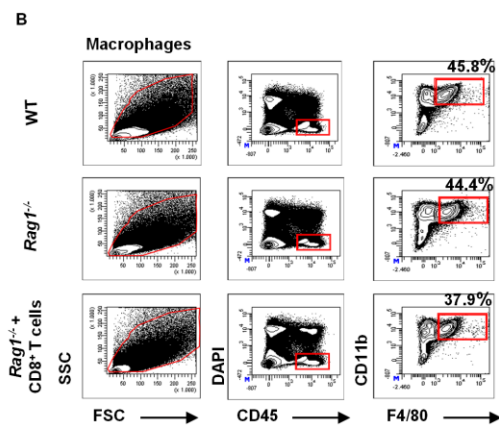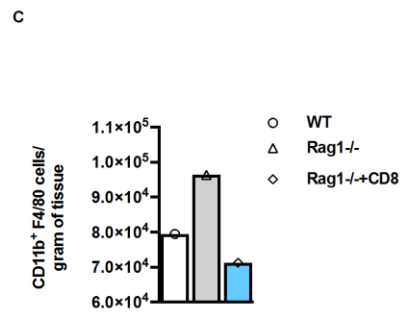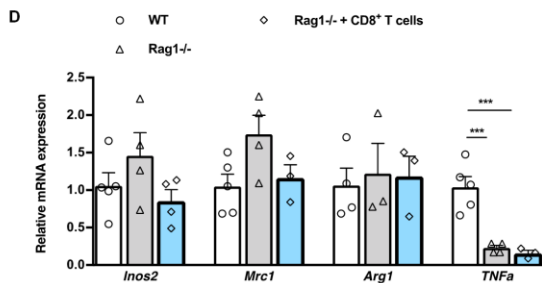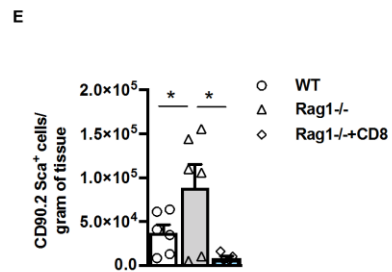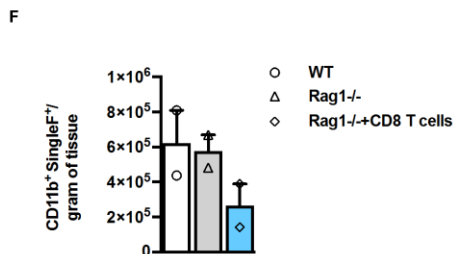

**Supplemental Figure 2. Increased homing of CD8<sup>+</sup> T cells in the scWAT of *Rag1*<sup>-/-</sup> following adoptive transfer**

(A) Representative gating strategy to identify mouse CD8<sup>+</sup> T cells in WT and *Rag1*<sup>-/-</sup> mice treated either with PBS or adoptively transferred with CD8<sup>+</sup> T cells ( $5 \times 10^6$ ), once/week for 2 weeks. Percentages of CD3 $\epsilon$ <sup>+</sup> CD8<sup>+</sup> cells gated on Viable CD45<sup>+</sup> DAPI<sup>-</sup> cells with a low side scatter profile are depicted. Data shown are representative of two independent experiments. Flow cytometry was performed after pooling n = 5 mice per group (B) Gating strategy to identify murine CD11b<sup>+</sup>F480<sup>+</sup> macrophages in WT mice or *Rag1*<sup>-/-</sup> mice treated with PBS or adoptively transferred with CD8<sup>+</sup> T cells ( $5 \times 10^6$ ), once/week for 2 weeks. Percentages of CD11b<sup>+</sup>F480<sup>+</sup> cells gated on Viable CD45<sup>+</sup> DAPI<sup>-</sup> cells with a low side scatter profile are depicted. Data shown are one experiment. Flow cytometry was performed after pooling n=5 mice per group. (C) The absolute number of resident macrophages per gram of tissue in the above treatments. Data shown are one experiment. Flow cytometry was performed after pooling n = 5 mice per group. (D) Gene expression analysis for M1 (*inos2*, *TNFA*) and M2 (*Arg1*, *Mrc1*) markers in the above groups. n=4 per group. Data are mean expression normalized to actin  $\pm$  S.E.M. Data shown are derived from one experiment. \*\*\* $p < 0.001$ , Student's t-test. (E) The absolute numbers of total lineage (Lin)-negative CD90.2<sup>+</sup> Sca-1<sup>+</sup> ILCs per gram of tissue in the scWAT of WT, *Rag1*<sup>-/-</sup> and *Rag1*<sup>-/-</sup> mice reconstituted with CD8<sup>+</sup> T cells. n=5 mice per group. Data shown are representative of two independent experiments and were analyzed by Student's t-test. Values are means  $\pm$  S.E.M. \* $p < 0.05$ . (F) The absolute number of CD11b<sup>+</sup> Siglec F<sup>+</sup> gated on the viable CD45<sup>+</sup>DAPI<sup>-</sup> cells per gram of tissue in the scWAT of WT, *Rag1*<sup>-/-</sup> and *Rag1*<sup>-/-</sup> mice reconstituted with CD8<sup>+</sup> T cells. n = 5 per group. Data shown are derived from one experiment. Flow cytometry was performed after pooling n  $\geq$  5 mice per group.

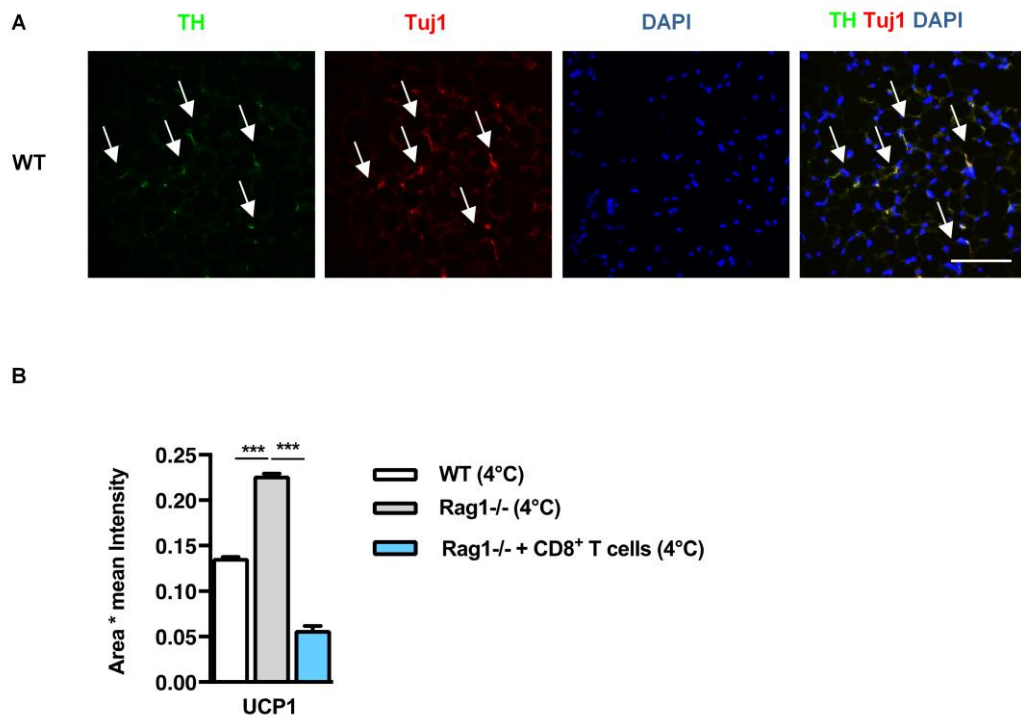

**Supplemental Figure 3. Reconstitution of *Rag1*<sup>-/-</sup> mice with CD8<sup>+</sup> T cells compromised significantly their response to cold.**

(A) Representative images of double IF staining for TH and Tuj1 of WT scWAT at baseline conditions. n=3 per group. Scale bar: 100µm. (B) Quantitation of mean intensity of UCP1 protein expression following cold exposure in the scWAT of WT, *Rag1*<sup>-/-</sup> and *Rag1*<sup>-/-</sup> mice reconstituted with CD8<sup>+</sup> T cells ( $5 \times 10^6$ ), once/week for 2 weeks. n = 3 per group. Data are means  $\pm$  SD intensity of 15 patches for every image. \*\*\* $p < 0.001$ . Data shown are derived from one out of two separate experiments.

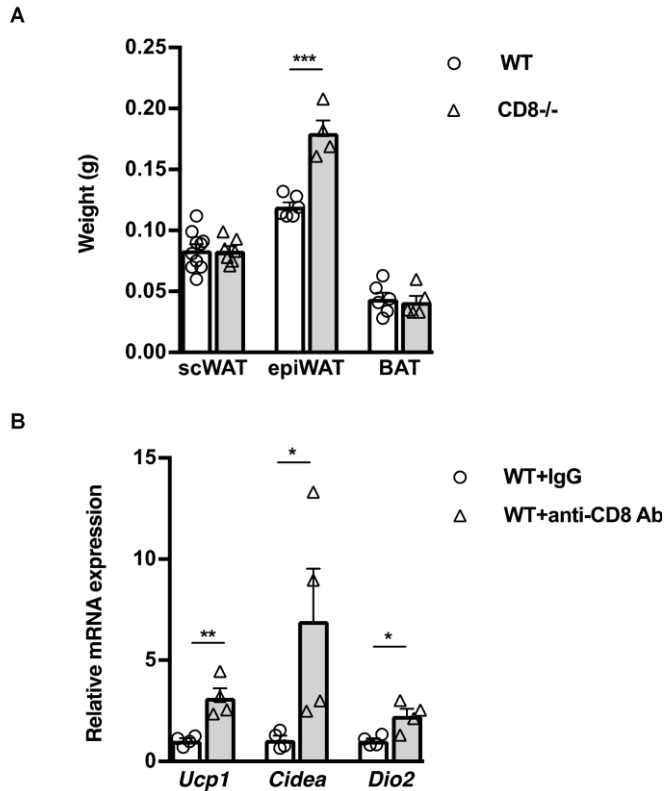

**Supplemental Figure 4. Impact of CD8<sup>+</sup> T cell depletion in the development of beige adipogenesis**

(A) Characterization of the absolute scWAT, epiWAT and BAT weight of WT and *IFN $\gamma$* <sup>-/-</sup> mice. n=5. Data are presented as means  $\pm$  S.E.M. \*\*\**p* < 0.001.

(B) Relative expression of beige genes (*Ucp1*, *Cidea*, *Dio2*) of age and weight-matched WT either received anti-CD8 antibody or IgG. n=4. Data are mean expression normalized to actin  $\pm$  S.E.M. \**p* < 0.05, \*\**p* < 0.01. t-test.

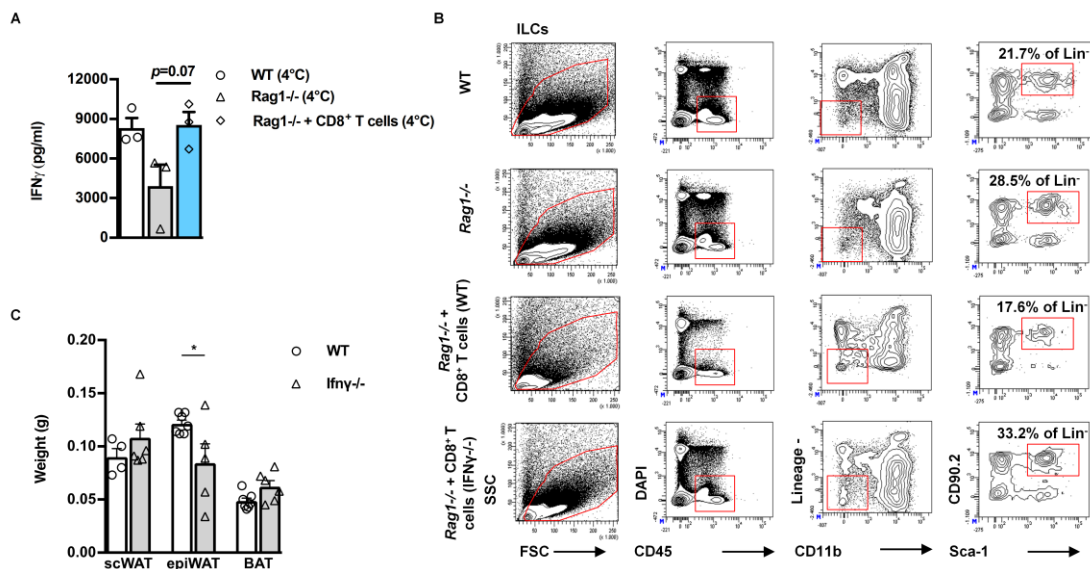

**Supplemental Figure 5. IFN $\gamma$  deficiency is associated with increase in total ILCs in the scWAT.**

(A) ScWAT tissue levels of IFN $\gamma$  (pg/ml) in WT mice or *Rag1*<sup>-/-</sup> following adoptive transfer of 5x10<sup>6</sup> CD8<sup>+</sup> T cells, or PBS injection (control), once/week for 2 weeks. n = 3 per group. Data are presented as means  $\pm$  S.E.M.  $p = 0,07$ , 1-way Anova with Bonferroni's post test. (B) Gating strategy for the identification of lineage (Lin)-negative CD90.2<sup>+</sup> Sca-1<sup>+</sup> ILCs of WT or *Ifny*<sup>-/-</sup> scWAT, pre-gated on live CD45<sup>+</sup> DAPI<sup>-</sup> cells. Percentage of cells stained positive for CD90.2<sup>+</sup> Sca-1<sup>+</sup> is depicted on the flow cytometry plots. Data shown are from one single experiment. Flow cytometry was performed after pooling n  $\geq$  4 mice per group. (C) Characterization of the absolute scWAT, epiWAT and BAT weight of WT and *IFN $\gamma$* <sup>-/-</sup> mice. n=6. Data are presented as means  $\pm$  S.E.M. \* $p < 0.05$ , t-test.

**Supplemental Table 1: Primers used for real-time PCR**

| <b>Gene</b>   | <b>Forward</b>                  | <b>Reverse</b>                  |
|---------------|---------------------------------|---------------------------------|
| Actin         | 5'-CCCAGGCATTGCTGACAGG- 3'      | 5'-TGGAAGGTGGACAGTGAGGC-3'      |
| Pgc1 $\alpha$ | 5'-TCACCCTCTGGCCTGACAAATCTT- 3' | 5'-TTTGATGGGCTACCCACAGTGTCT- 3' |
| Lipe          | 5'-AAGGACTTGAGCAACTCAGA-3'      | 5'-TTGACTATGGCTGACGTGTA-3'      |
| Ppara         | 5'-AAGAACCTGAGGAAGCCGTTCTGT- 3' | 5'-GCAGCCACAAACAGGGAAATGTCA-3'  |
| Mgll          | 5'-GACGGACAGTACCTCTTTTG- 3'     | 5'-AGAAAAGTAGGTTGGCCTCT-3'      |
| Hadha         | 5'-AGCAAGTGTTCAAAGGGCTGAACG- 3' | 5'-TGTGCTTTACACCGAGGTCCTCAA- 3' |
| Ucp1          | 5'-TCTTCTCAGCCGGAGTTTCAGCTT-3'  | 5'-ACCTTGATCTGAAGGCGGACTTT-3'   |
| Cidea         | 5'-ATCACAACCTGGCCTGGTTACG-3'    | 5'-TACTACCCGGTGTCCATTTCT-3'     |
| Prdm16        | 5'-CAGCACGGTGAAGCCATTC-3'       | 5'-GCGTGCATCCGCTTGTG-3'         |
| Dio2          | 5'-CAGTGTGGTGCACGTCTCCAATC-3'   | 5'-TGAACCAAAGTTGACCACCAG-3'     |
| Fgf21         | 5'-TACACAGATGACGACCAAGA-3'      | 5'-GGCTTCAGACTGGTACACAT-3'      |
| AdR1 $\alpha$ | 5'-GGGTCTTCTTCCCGAATTT-3'       | 5'-GCTGGAGCATGGGTATATGATAG-3'   |
| AdR3 $\beta$  | 5'-TGAAACAGCAGACAGGGACA-3'      | 5'-TCTTGACACTCCCTCAGCAC-3'      |
| Fasn          | 5'-CTCCGTGGACCTTATCACTA-3'      | 5'-CTGGGAGAGGTTGTAGTCAG-3'      |
| Acc1          | 5'-TAACAGAATCGACACTGGCTGGCT-3'  | 5'-ATGCTGTTCTCAGGCTCACATCT-3'   |
| Dgat          | 5'-TCATGGGTGTCTGTGGGTTA-3'      | 5'-CAGAGTGAAACCAGCCAACA-3'      |
| Srebp1c       | 5'-TGGCTTGGTGATGCTATGTT-3'      | 5'-TAAGGGGTTGGGAGTAGAGG-3'      |
| Cyclophilin   | 5'-CATCCTAAAGCATACAGGTCCTG-3'   | 5'-TCCATGGCTTCCACAATGTT-3'      |
| iNOS          | 5'-CAGAGGACCCAGAGACAAGC-3'      | 5'-CCTGGCCAGATGGGCCTCTA-3'      |
| Arg1          | 5'-AGACCACAGTCTGGCAGTTG-3'      | 5'-CCACCCAAATGACACATAGG-3'      |
